# Supplementary material for: A bismuth oxide nanosheet-coated electrospun carbon nanofiber film: a free-standing negative electrode for flexible asymmetric supercapacitors
Source: Royal Society of Chemistry journal article supplement (doi:10.1039/c6ta06755g), 2016-01-01
Supplement: c6ta06755g1.pdf [file c6ta06755g1.pdf]

## Supporting Information

# **Bismuth oxide nanosheets coated electrospun carbon nanofibers film: a free-standing negative electrode for flexible asymmetric supercapacitors**

Lu Li<sup>a, b</sup>, Xitian Zhang<sup>\*, a</sup>, Zhiguo Zhang<sup>b</sup>, Mingyi Zhang<sup>a</sup>, Lujia Cong<sup>a</sup>, Yu Pan<sup>a</sup>,  
Shuangyan Lin<sup>a</sup>.

<sup>a</sup> *Key Laboratory for Photonic and Electronic Bandgap Materials, Ministry of Education, School of Physics and Electronic Engineering, Harbin Normal University, Harbin 150025, People's Republic of China.*

<sup>b</sup> *Condensed mater science and technology institute, Harbin institute of technology, Harbin 150001, China*

\*Corresponding author:

E-mail: xtzhazhang@163.com (X. T. Zhang)

## Calculation methods:

### 1. Single Electrode

The areal capacitance ( $C_a$ ) of the electrode could be calculated from their CV curves and galvanostatic charge/discharge curves by the following equations.

$$C_a = \frac{\int IdV}{A \cdot v \cdot \Delta V}$$

Here  $C_a$  is areal capacitance ( $\text{mF cm}^{-1}$ ),  $I$  is the response current (A),  $V$  is the potential vs. Reference electrode,  $A$  is electrode area ( $\text{cm}^2$ ),  $v$  is the scan rate ( $\text{mV s}^{-1}$ ) and  $\Delta V$  is the potential window (V).

$$C_a = \frac{i \cdot \Delta t}{\Delta V}$$

Here  $C_a$  is areal capacitance ( $\text{mF cm}^{-1}$ ),  $i$  is the current density ( $\text{mA cm}^{-1}$ ),  $\Delta t$  is the discharging time (s) and  $\Delta V$  is the potential window (V).

### 2. ASC Device

The areal capacitance ( $C_a$ ), specific capacitance ( $C_s$ ), energy density ( $E$ ) and power density ( $P$ ) could be calculated by the following equations.

$$C_a = \frac{i \cdot \Delta t}{\Delta V}$$

$$C_s = \frac{C_a}{m}$$

$$E = \frac{1}{2} C \cdot (\Delta V)^2$$

$$P = \frac{E}{\Delta t}$$

Here  $C_a$  is areal capacitance ( $\text{mF cm}^{-1}$ ),  $i$  is the current density ( $\text{mA cm}^{-1}$ ),  $\Delta t$  is the discharging time (s),  $\Delta V$  is the potential window (V),  $m$  is the total mass of active materials grown on the two electrodes per unit area.

Table S1. Experimental conditions and chemical component of the prepared samples.

| Sample                                    | Time<br>(h) | Temperature<br>(°C) | Precursors                 |                 |                                                                 |                                      |
|-------------------------------------------|-------------|---------------------|----------------------------|-----------------|-----------------------------------------------------------------|--------------------------------------|
|                                           |             |                     | Ethylene<br>glycol<br>(mL) | Ethanol<br>(mL) | Bi(NO <sub>3</sub> ) <sub>3</sub> •<br>5H <sub>2</sub> O<br>(g) | ESCNF<br>paper<br>(cm <sup>2</sup> ) |
| Bi <sub>2</sub> O <sub>3</sub> /ESCNF-0.5 | 6           | 160                 | 6                          | 12              | 0.243                                                           | 2.5×3                                |
| Bi <sub>2</sub> O <sub>3</sub> /ESCNF-1   | 6           | 160                 | 6                          | 12              | 0.485                                                           | 2.5×3                                |
| Bi <sub>2</sub> O <sub>3</sub> /ESCNF-2   | 6           | 160                 | 6                          | 12              | 0.97                                                            | 2.5×3                                |

Table S2. Electrical conductivity of the aqueous electrolytes used in electrochemical experiments.

| Electrolyte                         | Conductivity (mS cm <sup>-1</sup> ) |
|-------------------------------------|-------------------------------------|
| 1 M KOH                             | 191                                 |
| 1 M NaOH                            | 141                                 |
| 1 M LiOH                            | 90                                  |
| 1 M Na <sub>2</sub> SO <sub>4</sub> | 87                                  |

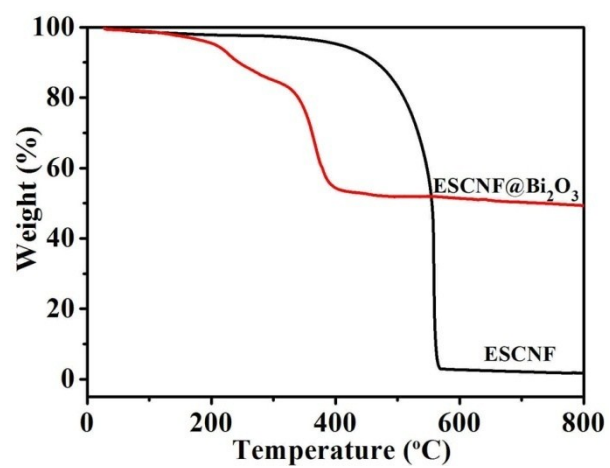

Fig. S1. TGA curves of bare ESCNF substrate and Bi<sub>2</sub>O<sub>3</sub> nanosheets grown on ESCNF substrate.

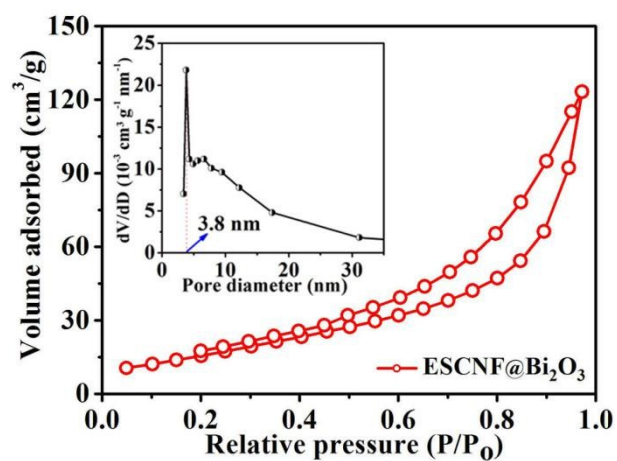

Fig. S2. Nitrogen adsorption and desorption isotherms of ESCNF@Bi<sub>2</sub>O<sub>3</sub>-1. Inset is the corresponding pore size distribution. The specific surface area is determined to be about 75.3 m<sup>2</sup> g<sup>-1</sup> by Brunauer-Emmett-Teller (BET) analysis.

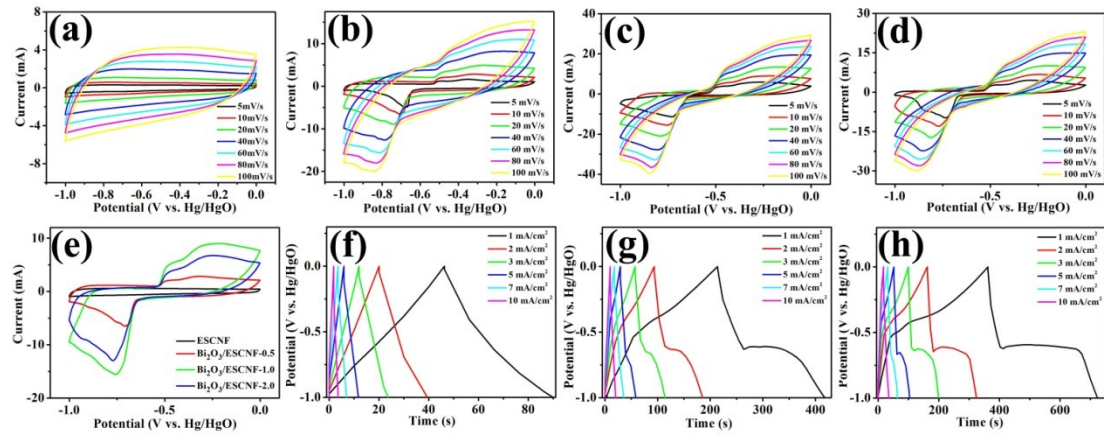

Fig. S3. CV curves at various scan rates in 1 M KOH of (a) ESCNF, (b) ESCNF@Bi<sub>2</sub>O<sub>3</sub>-0.5, (c) ESCNF@Bi<sub>2</sub>O<sub>3</sub>-1, (d) ESCNF@Bi<sub>2</sub>O<sub>3</sub>-2, (e) CV curves of samples at a scan rate of 10 mV s<sup>-1</sup>. GCD curves at different current densities in 1 M KOH of (f) ESCNF, (g) ESCNF@Bi<sub>2</sub>O<sub>3</sub>-0.5, (h) ESCNF@Bi<sub>2</sub>O<sub>3</sub>-2.

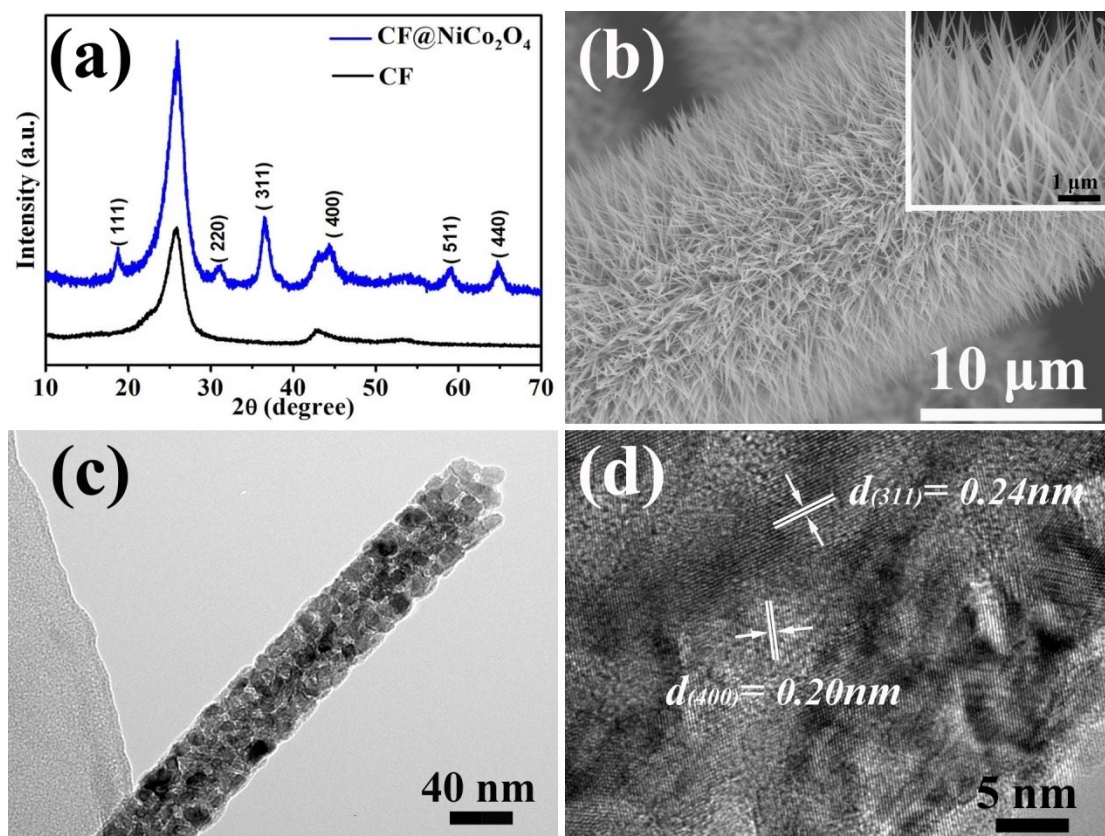

Fig. S4. (a) XRD patterns of the CF@NiCo<sub>2</sub>O<sub>4</sub> and CF substrate. (b) The SEM images of the CF@NiCo<sub>2</sub>O<sub>4</sub>. (c) TEM and (d) HRTEM image of the CF@NiCo<sub>2</sub>O<sub>4</sub>.



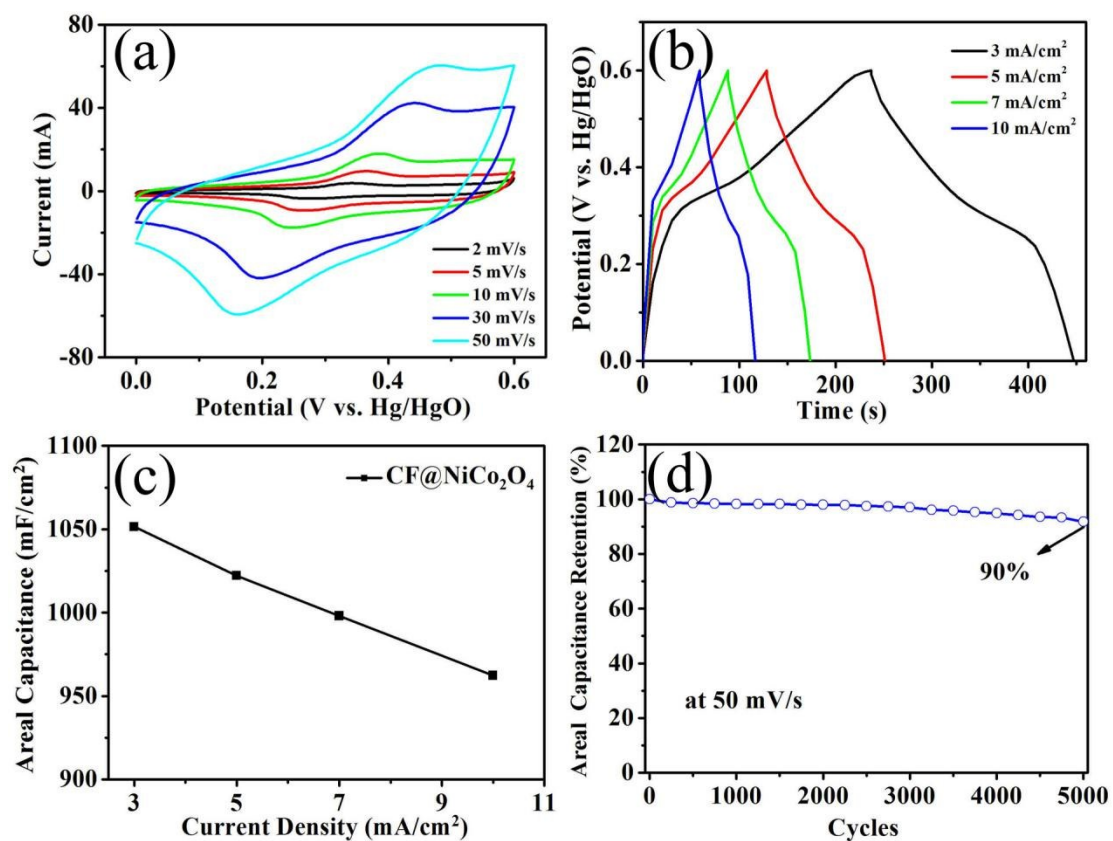

Fig. S5. (a) CV curves of CF@NiCo<sub>2</sub>O<sub>4</sub> composite electrodes at different scan rates. (b) GCD curves of CF@NiCo<sub>2</sub>O<sub>4</sub> composite electrodes at different current densities. (c) areal capacitance calculated from GCD curves. (d) cycling stability at a scan rate of 50 mV s<sup>-1</sup>.

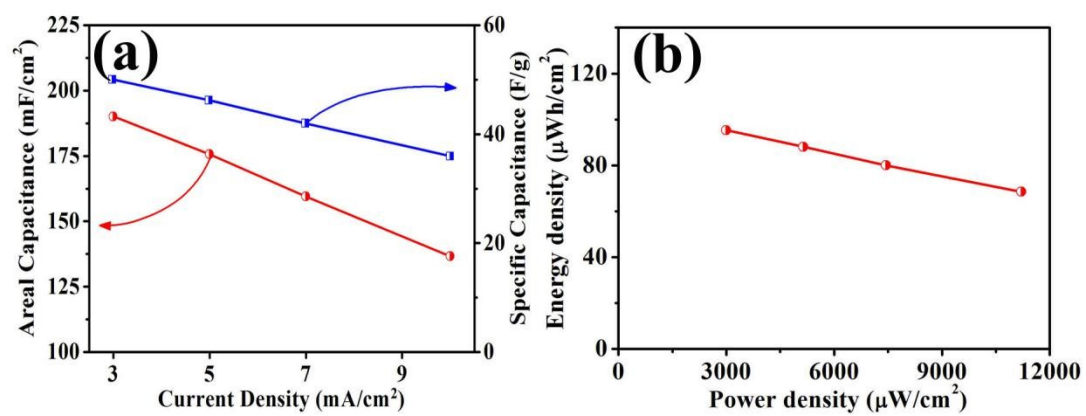

Fig. S6. (a) Areal and specific capacitance as a function of current density. (b) Areal energy and power of the ASC.
